# Supplementary material
Source: publisher figshare collection journal article supplement (https://acs.figshare.com/ndownloader/files/5064247)
Supplement: Supplementary file 1 [file 5064247]

## Supporting Information

# A Concise Asymmetric Total Synthesis of Obolactone

Jiyong Zhang,<sup>†</sup> Yang Li,<sup>†</sup> Wenkuan Wang,<sup>†</sup> Xuegong She<sup>\*†‡</sup> and Xinfu Pan<sup>\*†</sup>

Department of Chemistry, State Key Laboratory of Applied Organic Chemistry, Lanzhou University, Lanzhou, 730000, P. R. China

State Key Laboratory for Oxo Synthesis and Selective Oxidation, Lanzhou Institute of Chemical Physics, Chinese Academy of Sciences, Lanzhou 730000, P. R. China

[shexg@lzu.edu.cn](mailto:shexg@lzu.edu.cn)

## Table of Contents

### 1. Experimental Procedures and Spectroscopic Data

|                                      |       |
|--------------------------------------|-------|
| General Methods.....                 | S3    |
| Synthesis of Compound <b>4</b> ..... | S3    |
| Synthesis of Compound <b>5</b> ..... | S3-S4 |
| Synthesis of Compound <b>7</b> ..... | S4    |
| Synthesis of Compound <b>8</b> ..... | S5    |

### 2. Copies of NMR and HPLC Spectra

|                                                       |    |
|-------------------------------------------------------|----|
| <sup>1</sup> HNMR Spectra of Compound <b>3</b> .....  | S6 |
| <sup>13</sup> CNMR Spectra of Compound <b>3</b> ..... | S7 |
| <sup>1</sup> HNMR Spectra of Compound <b>4</b> .....  | S8 |

|                                                                   |     |
|-------------------------------------------------------------------|-----|
| <sup>13</sup> CNMR Spectra of Compound <b>4</b> .....             | S9  |
| <sup>1</sup> HNMR Spectra of Compound <b>5</b> .....              | S10 |
| <sup>13</sup> CNMR Spectra of Compound <b>5</b> .....             | S11 |
| <sup>1</sup> HNMR Spectra of Compound <b>6</b> .....              | S12 |
| <sup>13</sup> CNMR Spectra of Compound <b>6</b> .....             | S13 |
| <sup>1</sup> HNMR Spectra of Compound <b>7</b> .....              | S14 |
| <sup>13</sup> CNMR Spectra of Compound <b>7</b> .....             | S15 |
| <sup>1</sup> HNMR Spectra of Compound <b>8</b> .....              | S16 |
| <sup>13</sup> CNMR Spectra of Compound <b>8</b> .....             | S17 |
| <sup>1</sup> HNMR Spectra of Compound <b>9</b> .....              | S18 |
| <sup>13</sup> CNMR Spectra of Compound <b>9</b> .....             | S19 |
| <sup>1</sup> HNMR Spectra of Compound <b>12</b> .....             | S20 |
| <sup>13</sup> CNMR Spectra of Compound <b>12</b> .....            | S21 |
| <sup>1</sup> HNMR Spectra of Compound <b>13</b> .....             | S22 |
| <sup>13</sup> CNMR Spectra of Compound <b>13</b> .....            | S23 |
| <sup>1</sup> HNMR Spectra of Obolactone <b>1</b> .....            | S24 |
| <sup>13</sup> CNMR Spectra of Obolactone <b>1</b> .....           | S25 |
| The Table of <sup>1</sup> HNMR Comparison.....                    | S26 |
| CD Spectra of Obolactone <b>1</b> .....                           | S27 |
| HPLC Spectra of Mosher Ester Derived from Compound <b>3</b> ..... | S28 |
| HPLC Standard Report.....                                         | S29 |

## 1. Experimental procedure and spectroscopic data

**General Methods:** Oxygen- and moisture-sensitive reactions were carried out under argon atmosphere. Solvents were purified and dried by standard methods prior to use. All commercially available reagents were used without further purification unless otherwise noted. Column chromatography was performed on silica gel (200-300 mesh). Optical rotations were measured on a precision automated polarimeter. Infrared spectra were recorded on a FT-IR spectrometer.  $^1\text{H}$ NMR and  $^{13}\text{C}$ NMR spectra were recorded on a 300 MHz and a 400 MHz spectrometer. Chemical shifts are reported as  $\delta$  values relative to internal chloroform ( $\delta$  7.26 for  $^1\text{H}$  and 77.0 for  $^{13}\text{C}$ ).

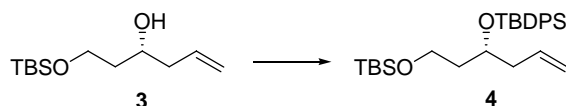

**(3R)-1-[(*tert*-Butyldimethylsilyl)oxyl]-3-[(*tert*-Butyldiphenyl)oxyl]hex-5-ene (4).** A stirred solution of alcohol **3** (2.663 g, 11.6 mmol) in dry DMF (5.8 mL) at rt was treated with imidazol (2.36g, 34.3 mmol) followed by TBDPSCl (4.46g, 16.2 mmol). After stirring overnight, the reaction mixture was diluted with EtOAc (50 mL). The resulting mixture was washed with brine (10  $\times$  5 mL), dried ( $\text{Na}_2\text{SO}_4$ ) and concentrated *in vacuo*. The residue was purified by column chromatography (hexanes / EtOAc, 100:1) to give silyl ether **4** (5.21 g, 96%) as a colorless oil:  $[\alpha]_{\text{D}}^{25}$   $-11^\circ$  (c 2.45,  $\text{CHCl}_3$ ); IR (KBr) 2955, 2931, 2858, 1254, 1108 835, 704  $\text{cm}^{-1}$ ;  $^1\text{H}$ NMR (300 MHz,  $\text{CDCl}_3$ )  $\delta$  0.02 (s, 6H), 0.85 (s, 9H), 1.07 (s, 9H), 1.72 (q,  $J$  = 6.3 Hz, 2H), 2.15-2.26 (m, 2H), 3.57-3.68 (m, 2H), 3.93-3.97 (m, 1H), 4.88-4.98 (m, 2H), 5.68-5.77 (m, 1H), 7.35-7.45 (m, 6H), 7.69 (d,  $J$  = 7.2 Hz);  $^{13}\text{C}$ NMR (75 MHz,  $\text{CDCl}_3$ )  $\delta$  -5.4, 18.2, 19.4, 39.2, 4.4, 60.0, 70.4, 116.9, 127.5, 129.5, 134.3, 134.8, 135.9; HRMS  $m/z$  calcd for  $\text{C}_{28}\text{H}_{44}\text{O}_2\text{Si}_2\text{Na}$  491.2773  $[\text{M} + \text{Na}]^+$ , found 491.2781.

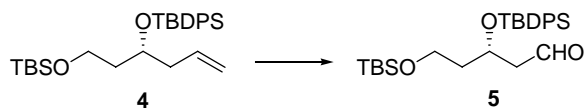

**(3S)-3-[(*tert*-Butyldiphenyl)oxyl]-5-[(*tert*-Butyldimethylsilyl)oxyl]hexanal (5).** To a solution of silyl ether **4** (2.81g, 6.00 mmol) in 3:1 THF-H<sub>2</sub>O (120 mL) was added N-methyl morpholine N-oxide (844 mg, 7.20mmol) and aqueous OsO<sub>4</sub> (0.1 M, 3 mL, 0.3 mmol). The resulting solution was stirred 10 h at rt before being stopped by the addition of excess solid sodium sulfite. The reaction mixture was then diluted with EtOAc and the layers were separated. The aqueous phase extracted with EtOAc (3 × 50 mL). The combined organic phase were washed with brine, dried (Na<sub>2</sub>SO<sub>4</sub>) and concentrated *in vacuo*. The resultant oil was dissolved in 120 mL 3:1 THF-H<sub>2</sub>O, to which was added NaIO<sub>4</sub> (3.85g, 18.0mmol). The reaction mixture was stirred 2 h at rt before being diluted with H<sub>2</sub>O and EtOAc. The layers were separated, and the aqueous phase extracted with EtOAc (3 × 50 mL). The combined organic phase were washed with brine, dried (Na<sub>2</sub>SO<sub>4</sub>) and concentrated *in vacuo*. The residue was purified by column chromatography (hexanes / EtOAc, 50:1) to give aldehyde **5** (2.37g, 84%) as a colorless oil:  $[\alpha]_D^{25}$  -2° (c 1.45, CHCl<sub>3</sub>); IR (KBr) 2955, 2951, 1727, 1107 835, 704 cm<sup>-1</sup>; <sup>1</sup>HNMR (300 MHz, CDCl<sub>3</sub>)  $\delta$  0.01 (s, 6H), 0.85 (s, 9H) 1.09 (s, 9H), 1.75-1.89 (m, 2H), 2.55 (ddd, *J* = 15.6, 5.5, 2.9 Hz, 1H), 2.59 (ddd, *J* = 15.6, 5.7, 1.7 Hz, 1H), 3.57-3.69 (m, 2H), 4.42-4.46 (m, 2H), 7.38-7.48 (m, 6H), 7.70 (d, *J* = 6.6 Hz, 4H), 9.70 (t, *J* = 2.1 Hz, 1H); <sup>13</sup>CNMR (75 MHz, CDCl<sub>3</sub>)  $\delta$  -5.5, 18.1, 19.3, 25.8, 26.9, 40.0, 50.4, 59.4, 67.2, 127.7, 129.8, 133.7, 135.8, 202.1; HRMS *m/z* calcd for C<sub>27</sub>H<sub>43</sub>O<sub>3</sub>Si<sub>2</sub> 471.2751 [M + H]<sup>+</sup>, found 471.2758.

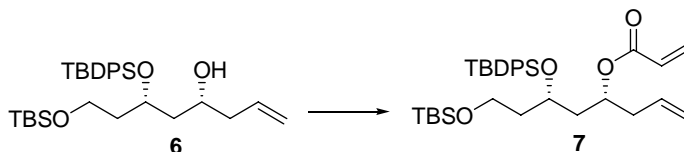

**(3S,5R)-1-[(*tert*-Butyldimethylsilyl)oxyl]-3-[(*tert*-Butyldiphenyl)oxyl]oct-7-ene-5-yl**

**Acrylate (7).** Under Ar, to a solution of alcohol **6** (1.35 g, 2.60 mmol) in dry CH<sub>2</sub>Cl<sub>2</sub> (20 mL) at 0°C was added Et<sub>3</sub>N (1.47mL, 10.5 mmol) and acryloyl chloride (0.43 mL, 5.2 mmol). The reaction mixture was stirred at 0°C for 2 h and diluted with CH<sub>2</sub>Cl<sub>2</sub> (20 mL), Saturated NaHCO<sub>3</sub>, and water. The aqueous phase was extracted with CH<sub>2</sub>Cl<sub>2</sub> (3 × 20 mL) and the combined organic extracts were washed with brine, dried (Na<sub>2</sub>SO<sub>4</sub>) and concentrated *in vacuo*. The residue was purified by column chromatography (hexanes / EtOAc, 50:1) to give ester **7** (1.38 g, 94%) as a colorless oil:  $[\alpha]_D^{25}$  -12° (c 2.65, CHCl<sub>3</sub>); IR (KBr) 2955, 2931, 2858, 1725, 1469, 1428, 1405, 1256, 1193, 1108, 837, 705 cm<sup>-1</sup>; <sup>1</sup>HNMR (400 MHz, CDCl<sub>3</sub>)  $\delta$  -0.02 (s, 6H), 0.84 (s, 9H), 1.07 (s, 9H), 1.69-1.84 (m, 4H), 2.09-2.23 (m, 2H), 3.64 (ddt, *J* = 16.8, 6.6, 3.2 Hz, 2H), 3.94-3.98 (m,

2H), 4.92-4.99 (m, 2H), 5.08-5.11 (m, 1H), 5.57-5.63 (m, 1H), 5.73 (d,  $J = 10.8$  Hz), 5.94 (dd,  $J = 17.2, 10.4$  Hz, 1H), 6.23 (d,  $J = 17.6$  Hz, 1H), 7.34-7.66 (m, 6H), 7.67-7.69 (m, 4H);  $^{13}\text{C}$ NMR (100 MHz,  $\text{CDCl}_3$ )  $\delta$  -5.4, 18.2, 19.4, 25.9, 27.0, 38.8, 39.2, 40.5, 59.5, 67.9, 70.5, 117.8, 127.5, 128.7, 129.5, 130.2, 133.3, 134.1, 134.3, 135.9, 165.4; HRMS  $m/z$  calcd for  $\text{C}_{33}\text{H}_{50}\text{O}_4\text{Si}_2\text{Na}$  589.3146  $[\text{M} + \text{Na}]^+$ , found 589.3142.

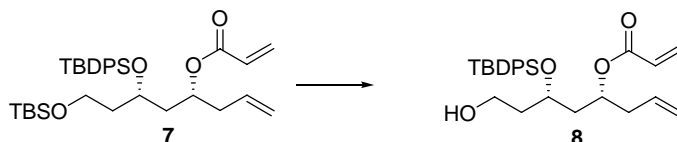

**(3S,5R)-3-[(*tert*-Butyldiphenyl)oxyl]oct-7-ene-1-ol-5-yl Acrylate (8).** To a solution of ester **7** (1.13g, 2.00 mmol) in 20:1 THF- $\text{H}_2\text{O}$  (10.5 mL) was added  $\text{TsOH} \cdot 2\text{H}_2\text{O}$  (38 mg, 0.2 mmol). The resulting solution was stirred at rt for 7 h. Saturated  $\text{NaHCO}_3$  was added, and the mixture was extracted with EtOAc ( $4 \times 30$  mL). The combined organic extracts were washed with brine, dried ( $\text{Na}_2\text{SO}_4$ ) and concentrated *in vacuo*. The residue was purified by column chromatography (hexanes / EtOAc, 10:1) to give **8** (805 mg, 89%) as a colorless oil:  $[\alpha]_{\text{D}}^{25} -20^\circ$  (c 1.80,  $\text{CHCl}_3$ ); IR (KBr) 3425, 2931, 1722, 1428, 1406, 1272, 1195, 1108, 1066, 704  $\text{cm}^{-1}$ ;  $^1\text{H}$ NMR (400 MHz,  $\text{CDCl}_3$ )  $\delta$  1.06 (s, 9H), 1.66-1.92 (m, 4H), 2.01 (s, 1H), 2.15 (dd,  $J = 12.2, 6.2$  Hz), 3.68-3.74 (m, 2H), 3.97-4.00 (m, 1H), 4.94-5.00 (m, 3H), 5.54-5.61 (m, 1H), 5.73 (dd,  $J = 10.6, 1.4$  Hz, 1H), 5.89 (dd,  $J = 17.2, 10.0$  Hz, 2H), 6.19 (dd,  $J = 9.2, 1.2$  Hz, 1H), 7.36-7.46 (m, 6H), 7.68 (d,  $J = 6.4$  Hz);  $^{13}\text{C}$ NMR (100 MHz,  $\text{CDCl}_3$ )  $\delta$  19.2, 27.0, 37.5, 39.0, 40.2, 59.5, 69.1, 70.3, 118.1, 127.6, 127.7, 128.4, 129.8, 130.6, 133.0, 133.5, 133.7, 135.9, 135.9, 165.5; HRMS  $m/z$  calcd for  $\text{C}_{27}\text{H}_{36}\text{O}_4\text{SiNa}$  475.2281  $[\text{M} + \text{Na}]^+$ , found 475.2276.

## 2. Copies of NMR and HPLC Spectra

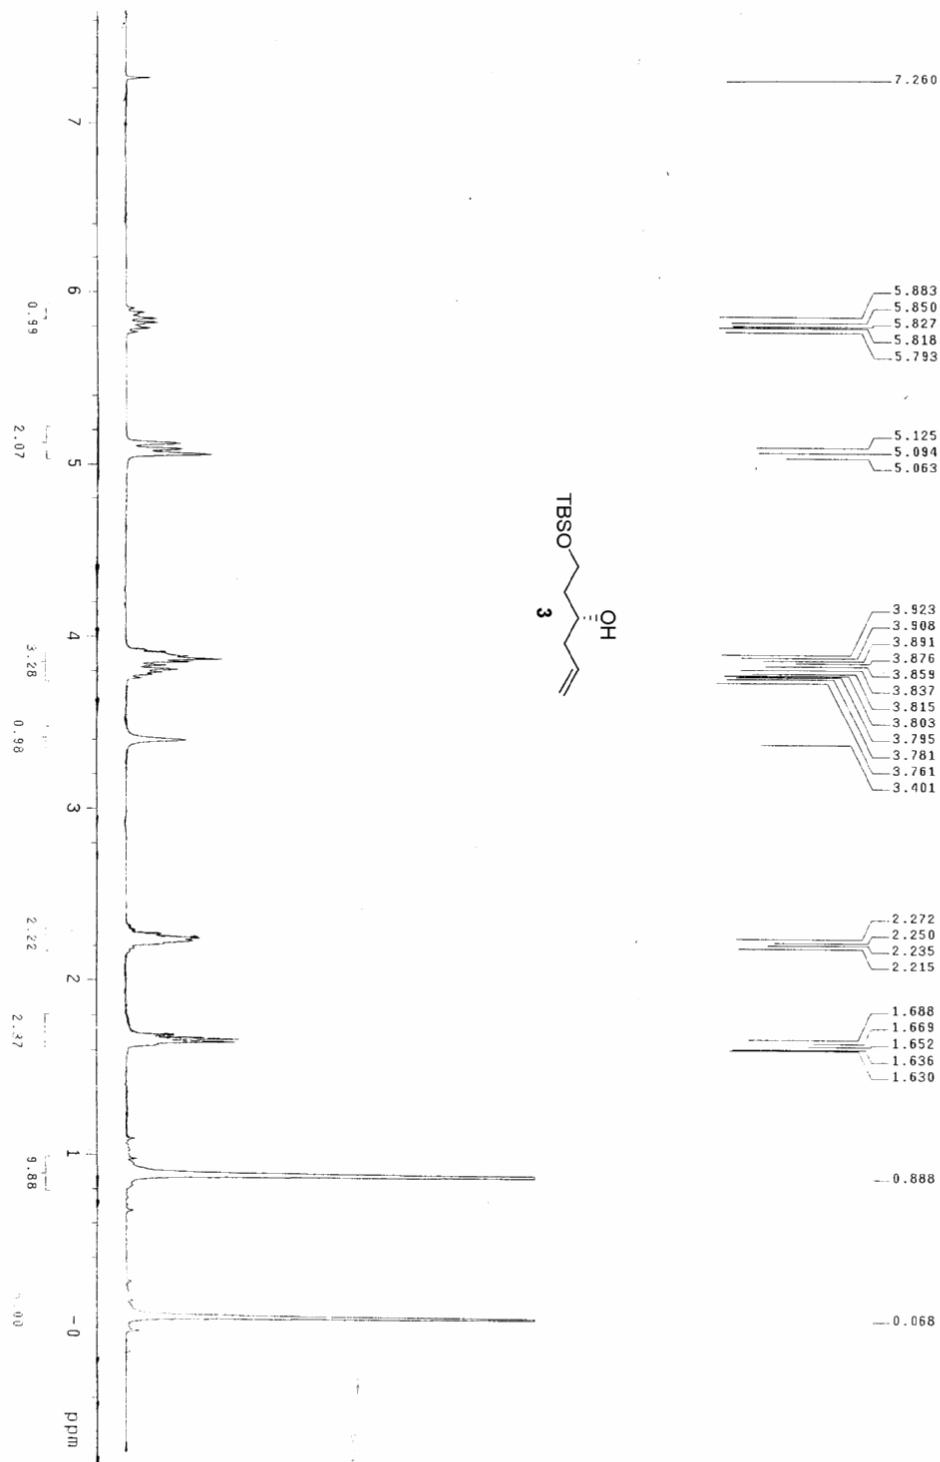

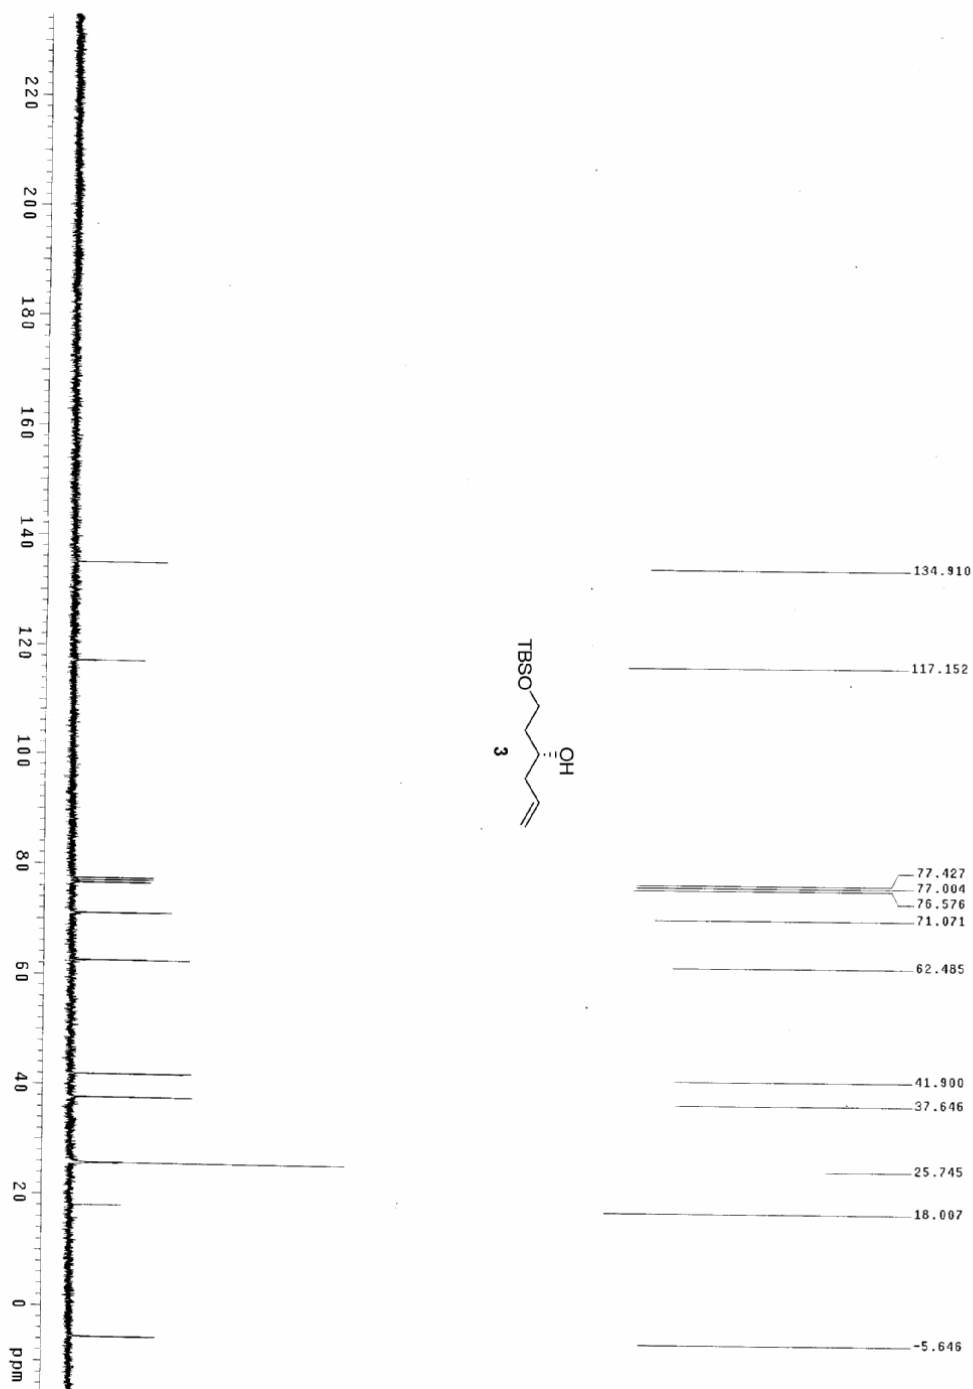







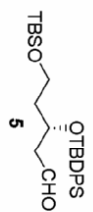

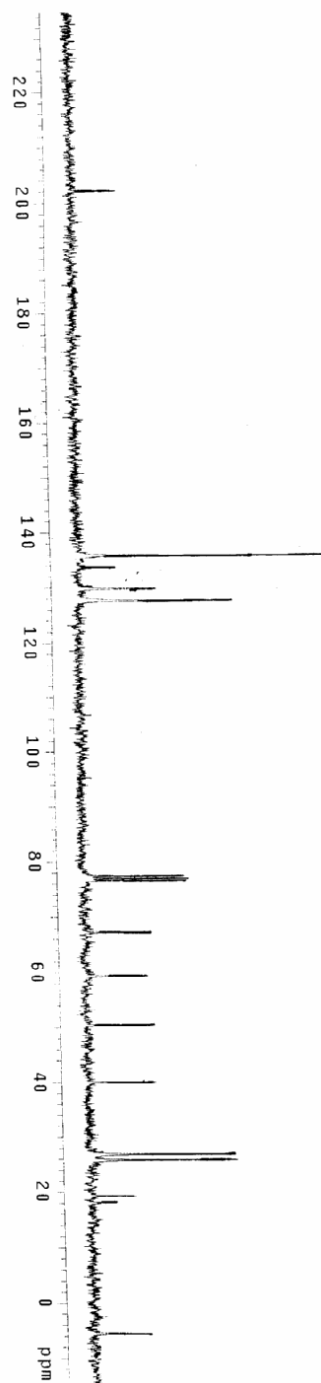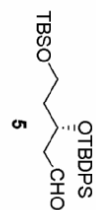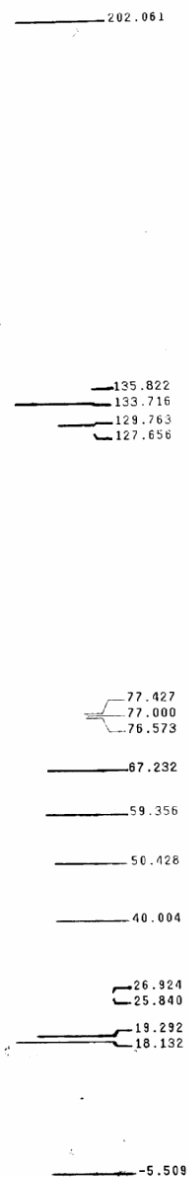







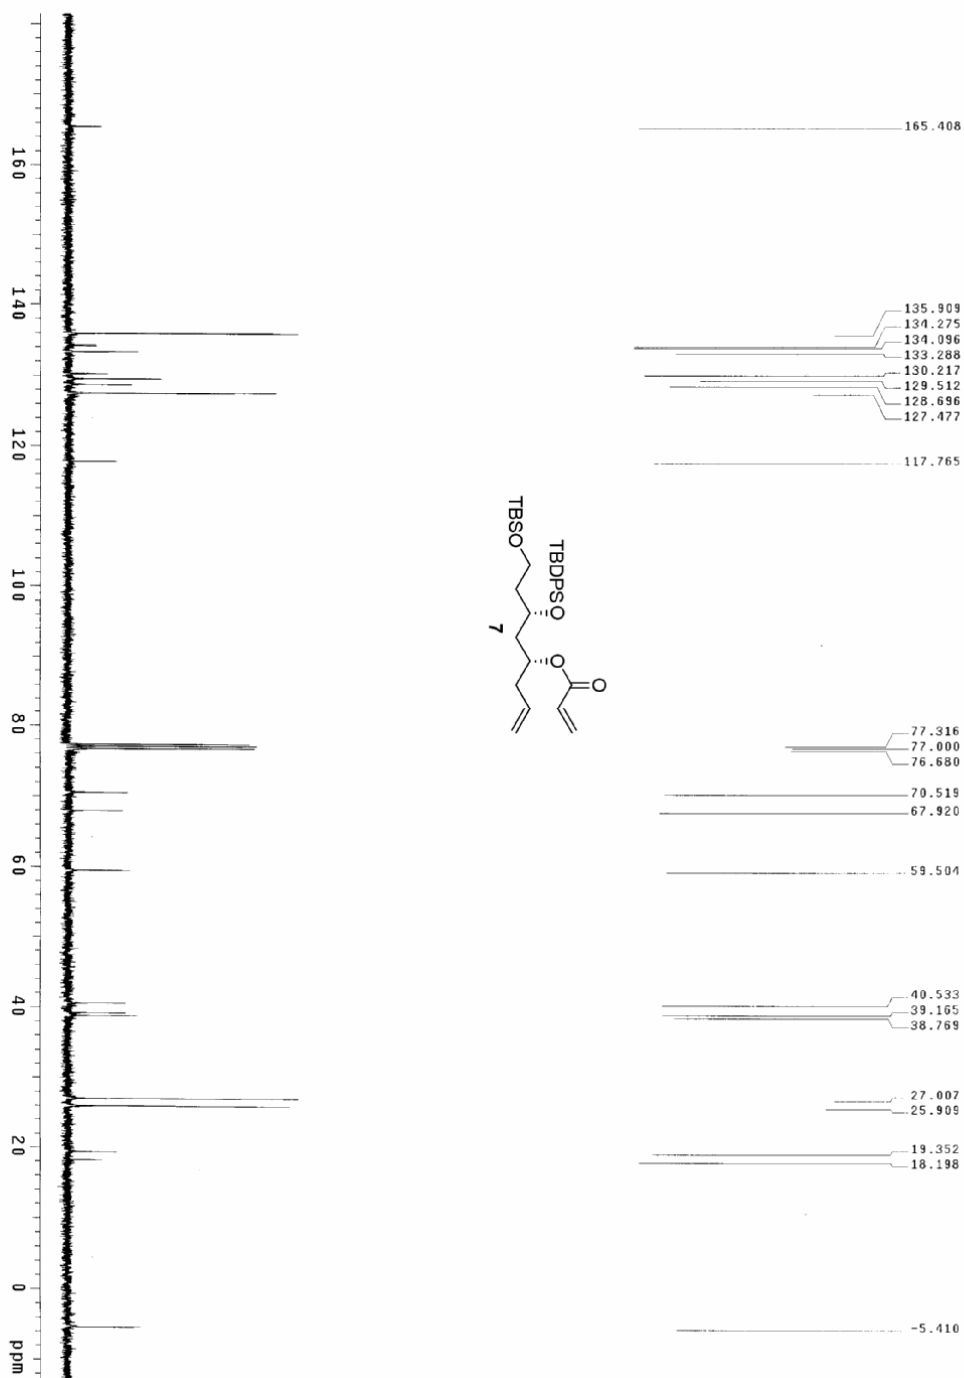





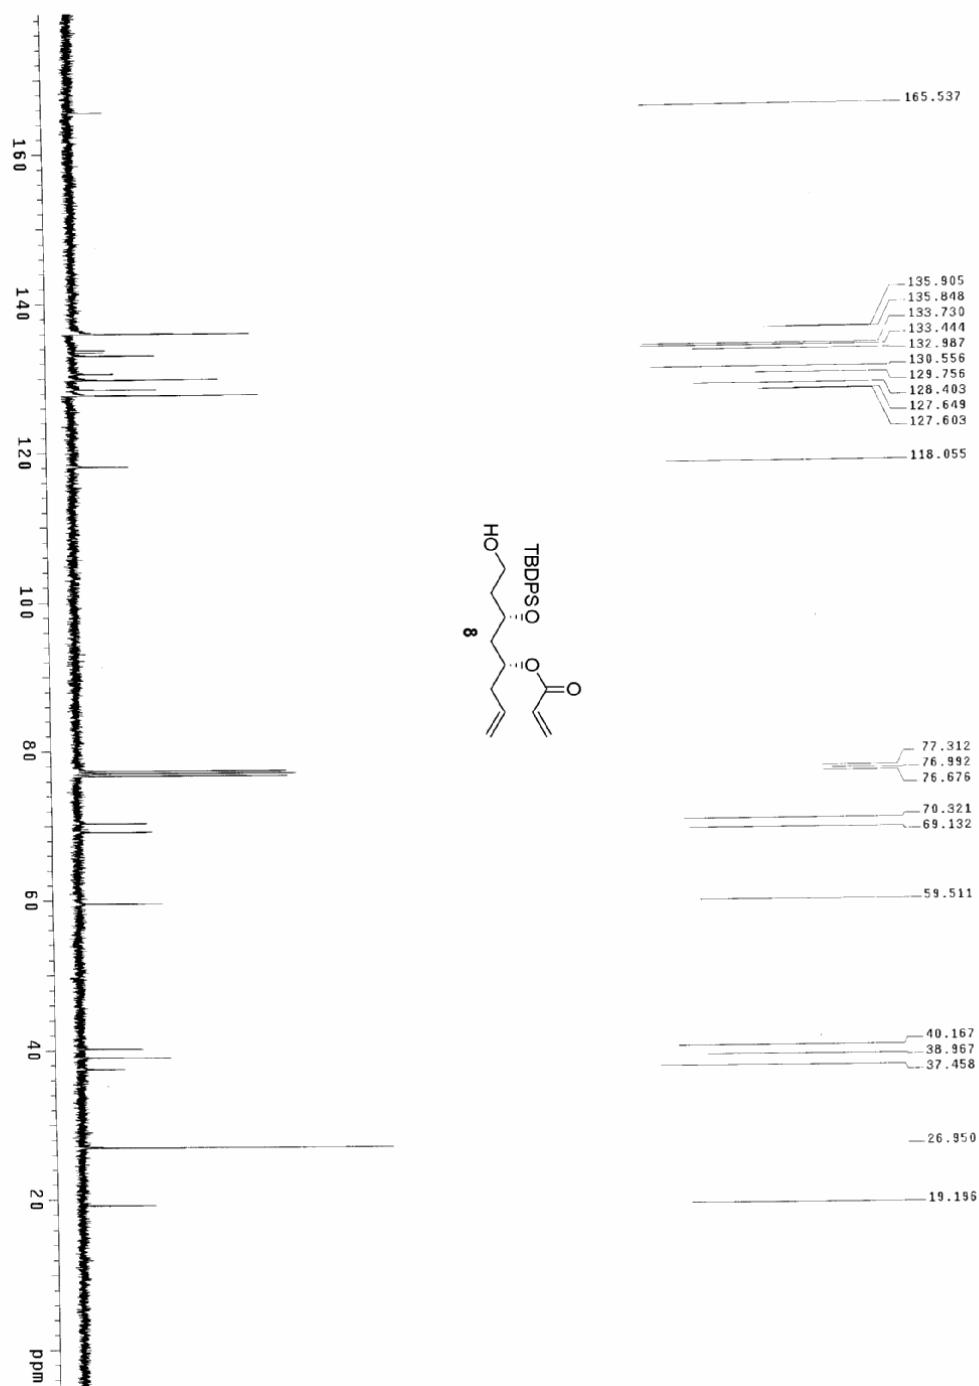



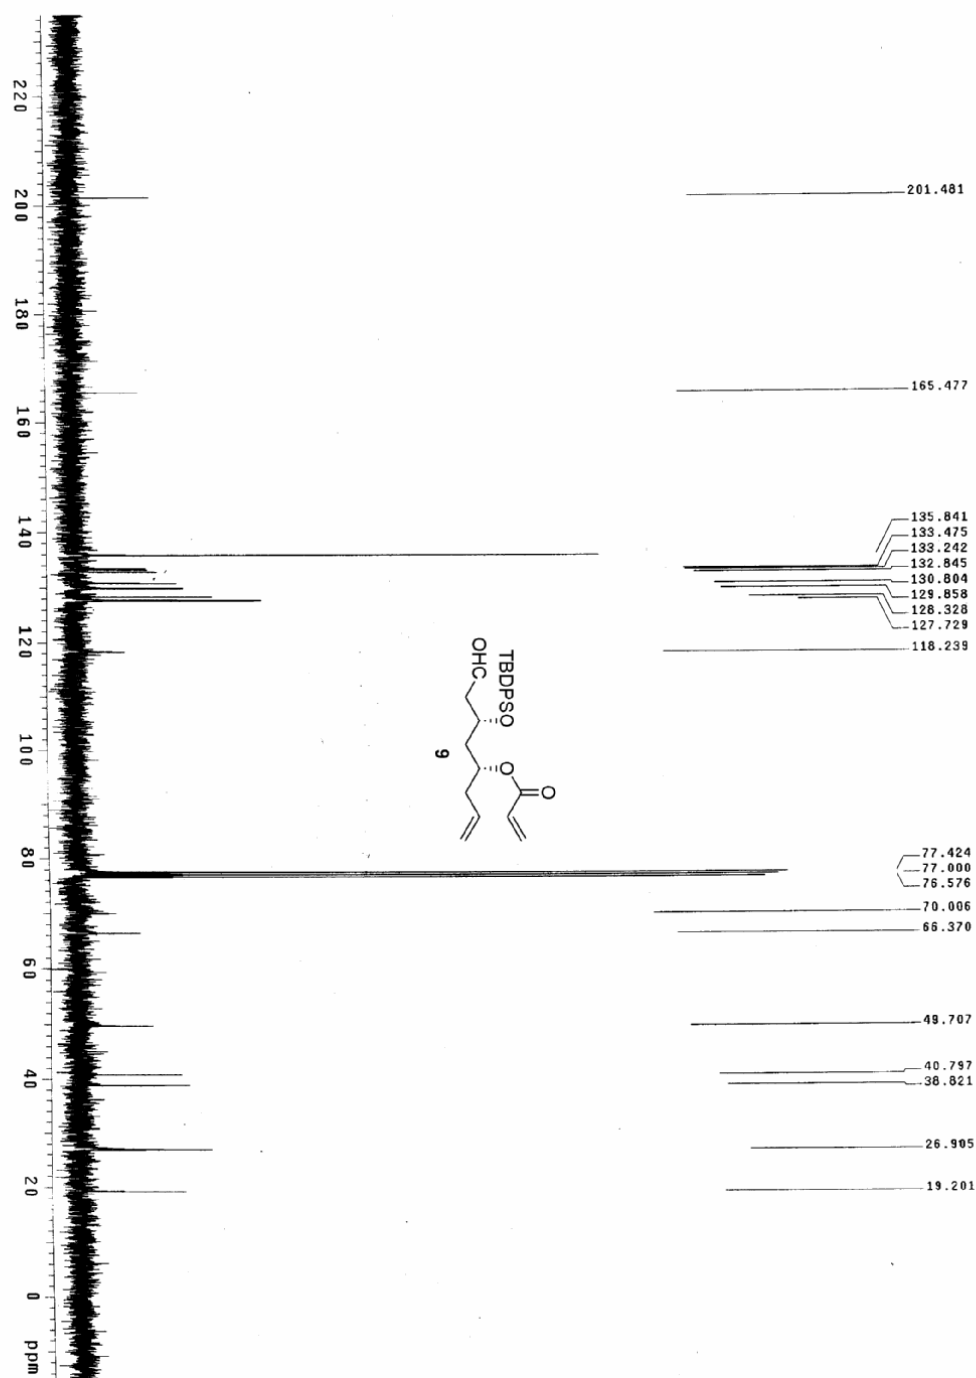

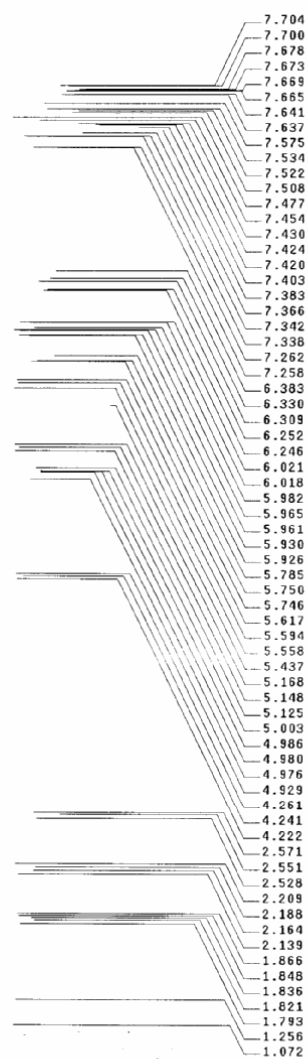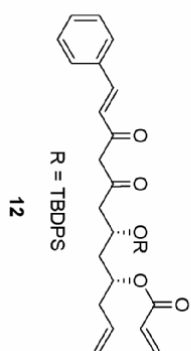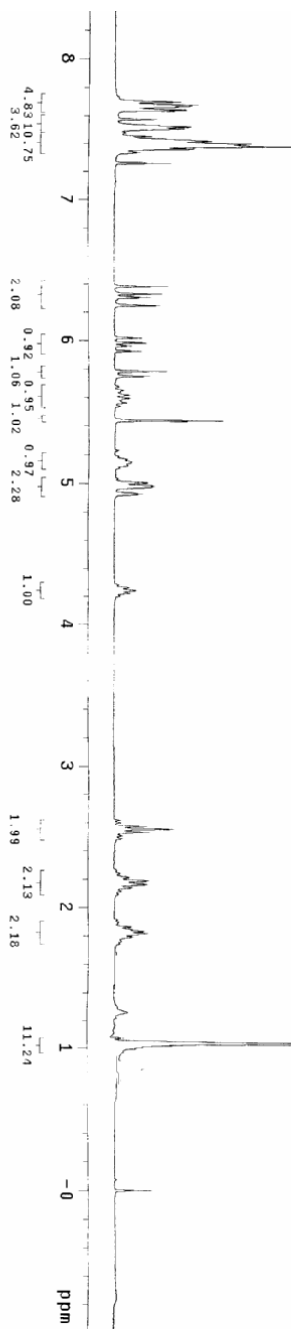

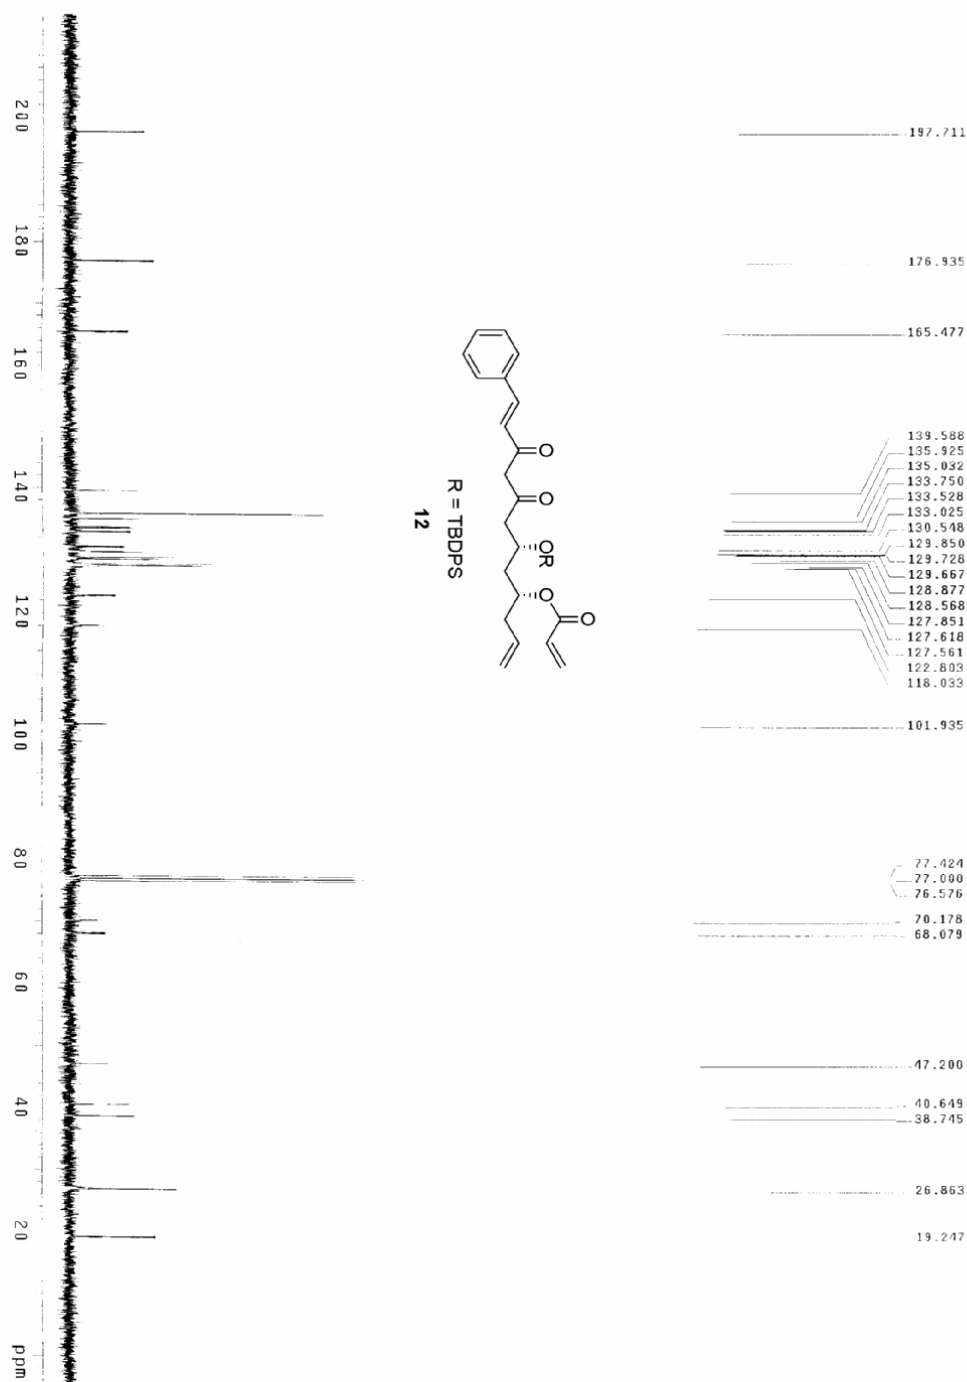

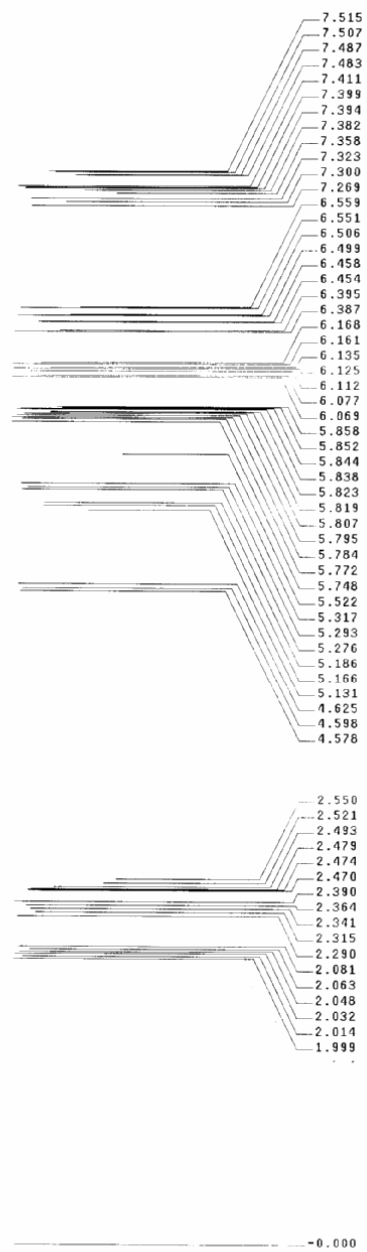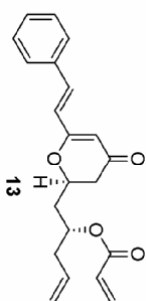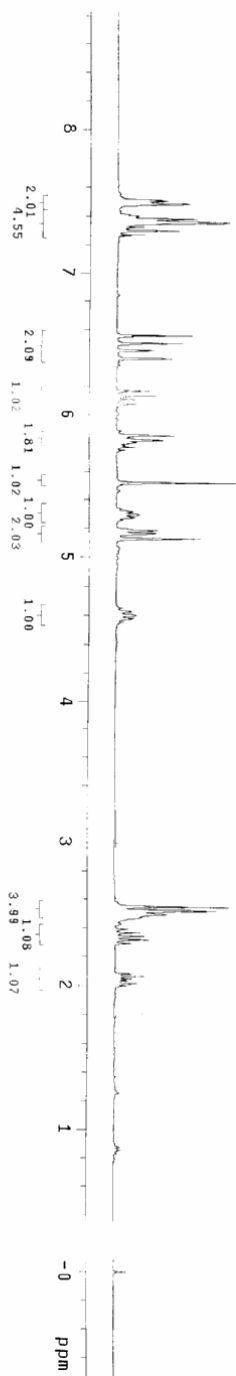

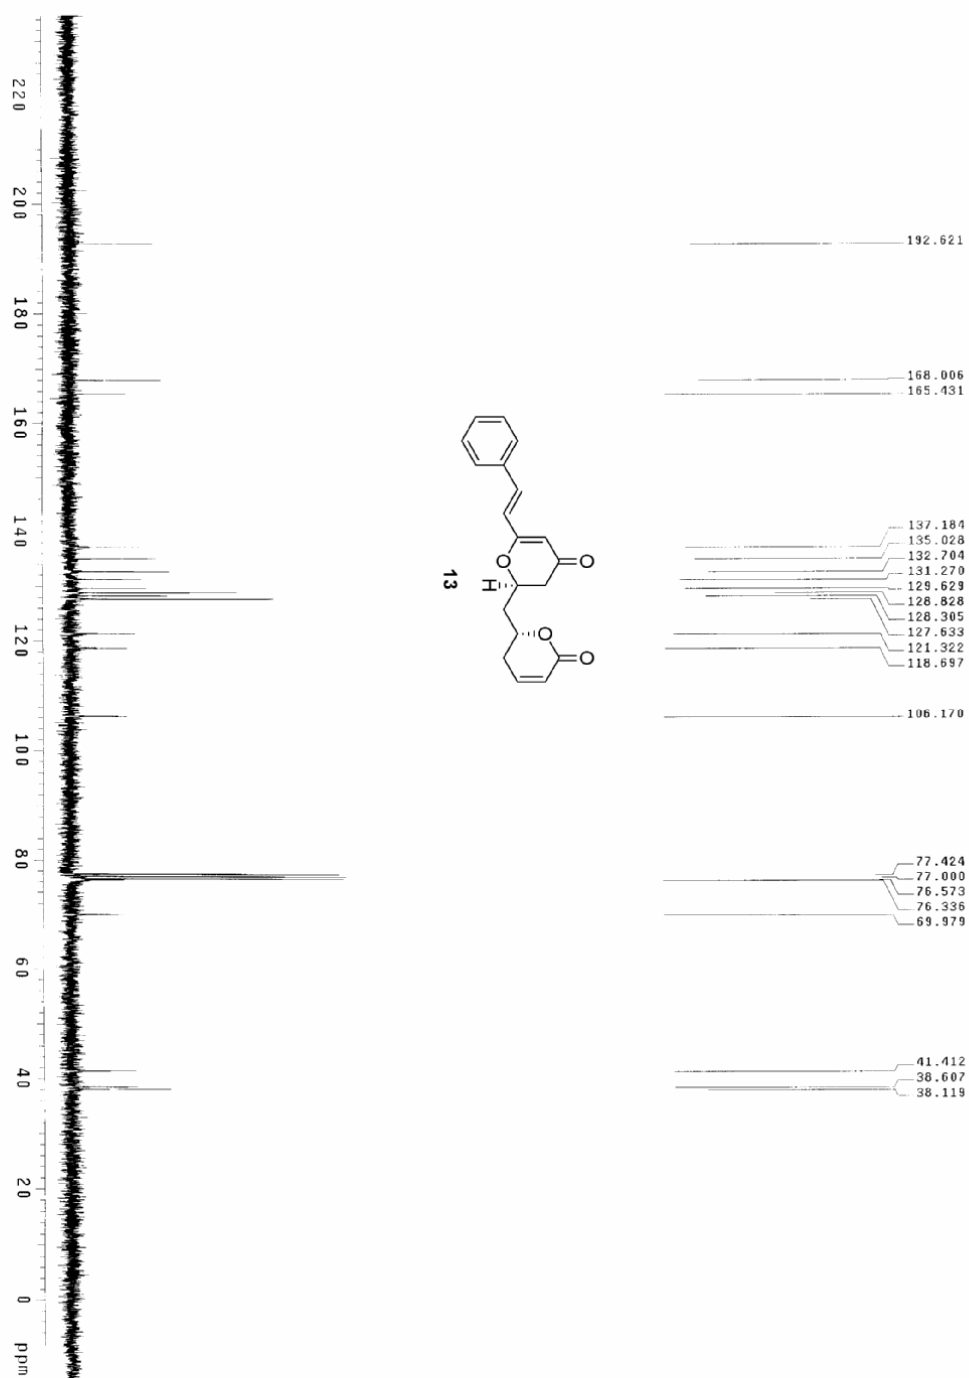

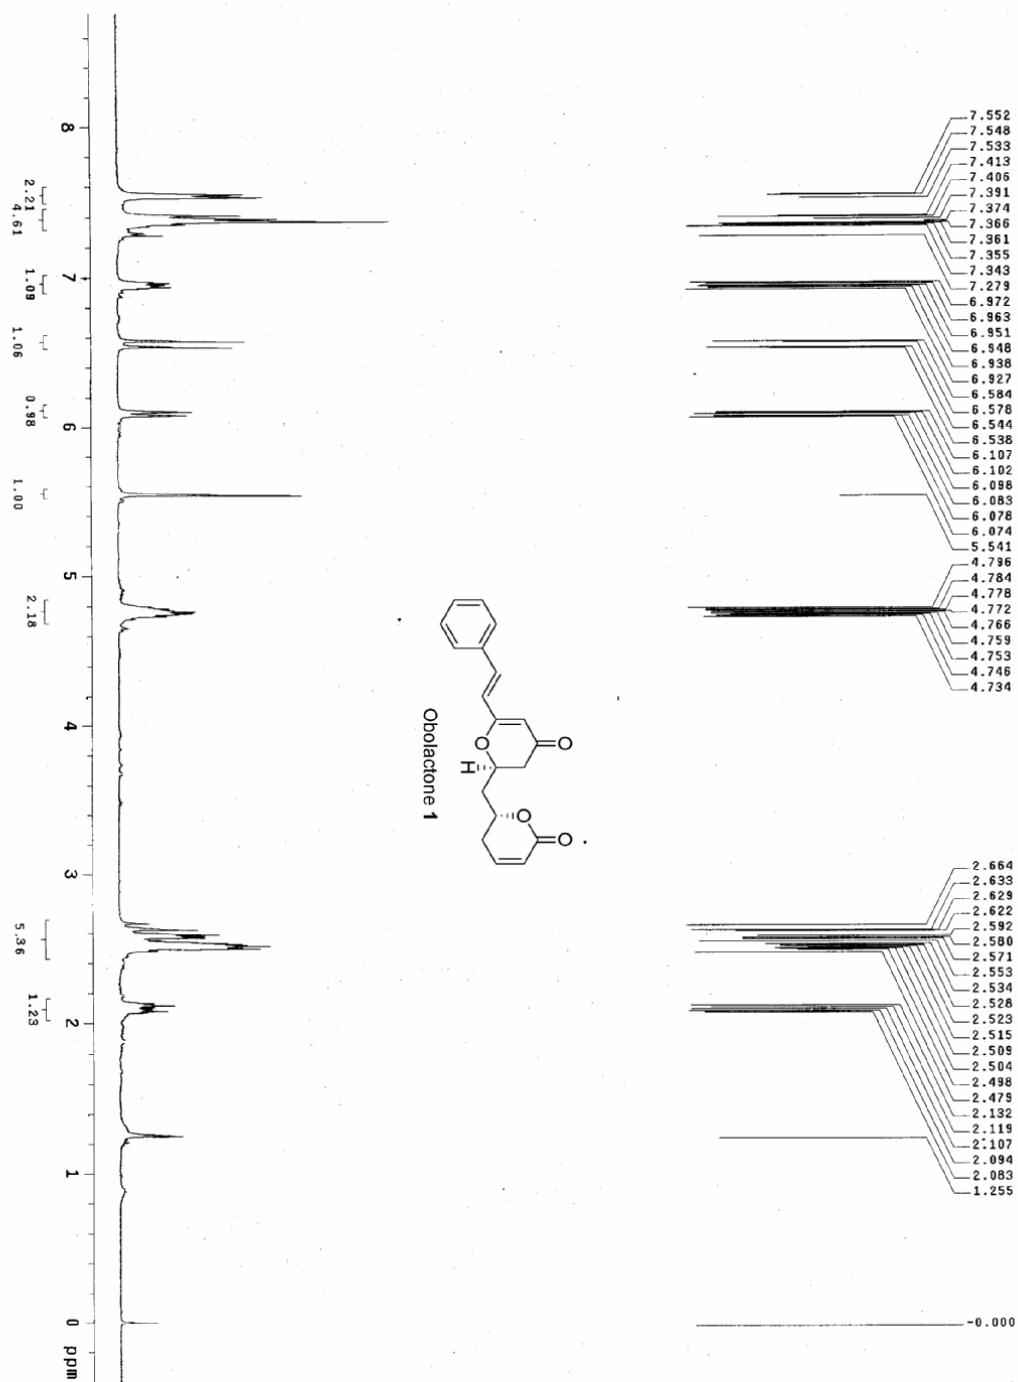



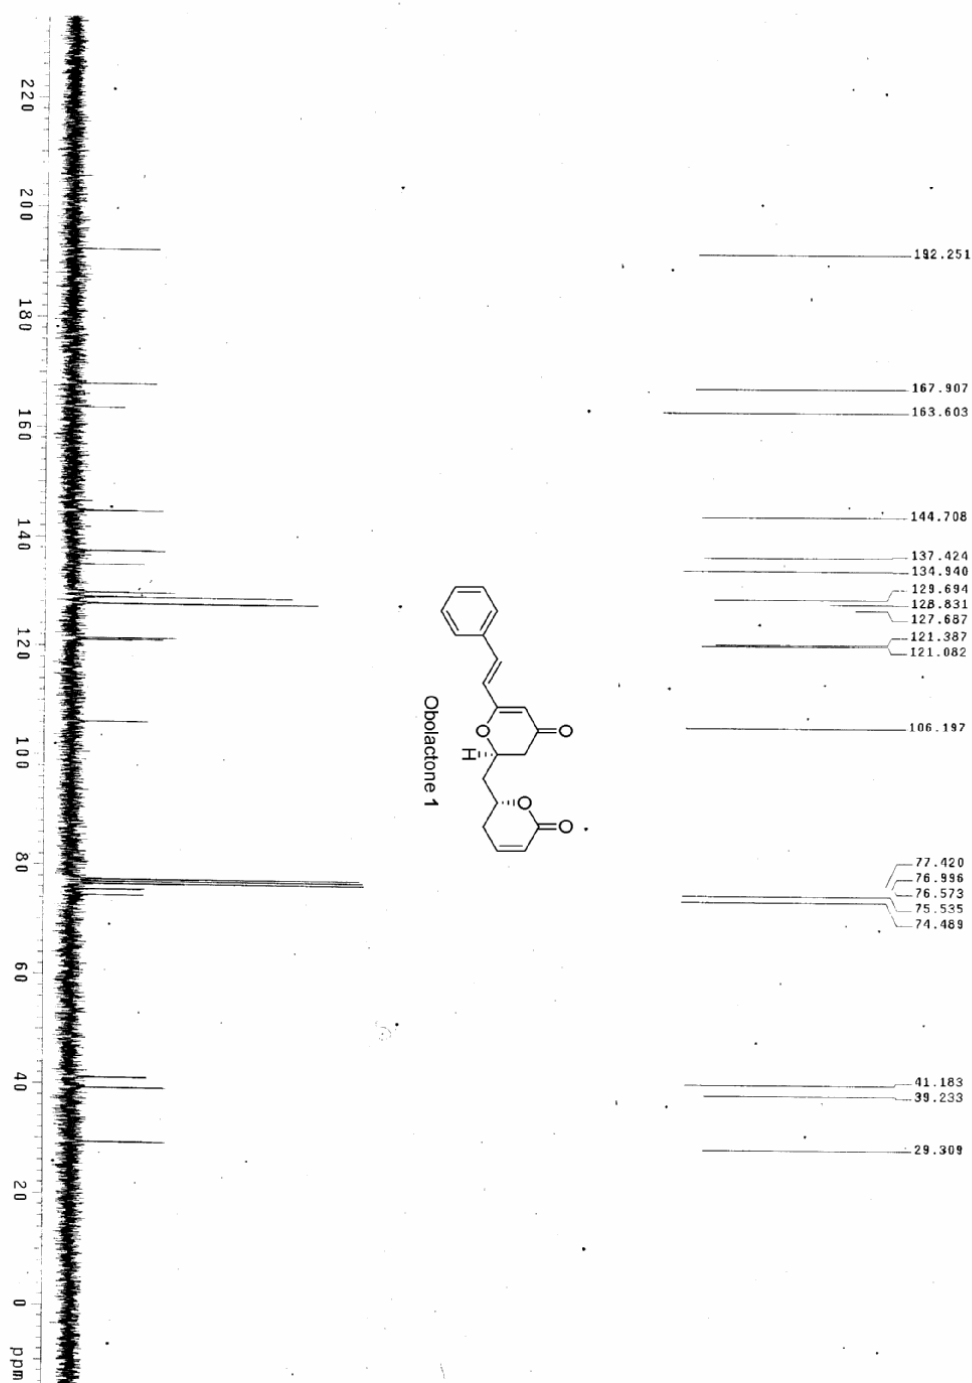

**Table 1:** Comparison of the  $^1\text{H}$ NMR spectrum of natural obolactone with that of the synthetic sample (400 MHz,  $\text{CDCl}_3$ ).

| Synthetic obolactone                | Natural obolactone                  |
|-------------------------------------|-------------------------------------|
| 2.09 (dt, $J = 14.7$ , 5.0 Hz, 1H)  | 2.09 (dt, $J = 14.7$ , 5.1 Hz, 1H)  |
| 2.48-2.53 (m, 3H)                   | 2.50 (m, 1H) and 2.51 (m, 2H)       |
| 2.55 (dd, $J = 16.8$ , 4.5 Hz, 1H)  | 2.55 (dd, $J = 16.7$ , 4.5 Hz, 1H)  |
| 2.62 (dd, $J = 16.8$ , 12.2 Hz, 1H) | 2.62 (dd, $J = 16.7$ , 12.2 Hz, 1H) |
| 4.73-4.80 (m, 2H)                   | 4.74 (m, 1H) and 4.77 (m, 1H)       |
| 5.54 (s, 1H)                        | 5.54 (s, 1H)                        |
| 6.09 (dt, $J = 9.8$ , 1.8 Hz, 1H)   | 6.08 (dt, $J = 9.9$ , 1.8 Hz, 1H)   |
| 6.55 (dd, $J = 16.0$ , 2.4 Hz, 1H)  | 6.55 (d, $J = 16.0$ , 1H)           |
| 6.95 (dt, $J = 9.9$ , 3.9 Hz, 1H)   | 6.93 (dt, $J = 9.9$ , 3.9 Hz, 1H)   |
| 7.39 (d, $J = 16.0$ Hz, 1H)         | 7.39 (d, $J = 15.9$ Hz, 1H)         |
| 7.34-7.41 (m, 3H)                   | 7.37 (m, 3H)                        |
| 7.53-7.55 (m, 2H)                   | 7.53 (m, 2H)                        |

# 1-Smooth

Data name: 1-Smooth  
 File name: G:\06.2.16-pxf.ols  
 Created: 2/16/2006 10:02:16 AM

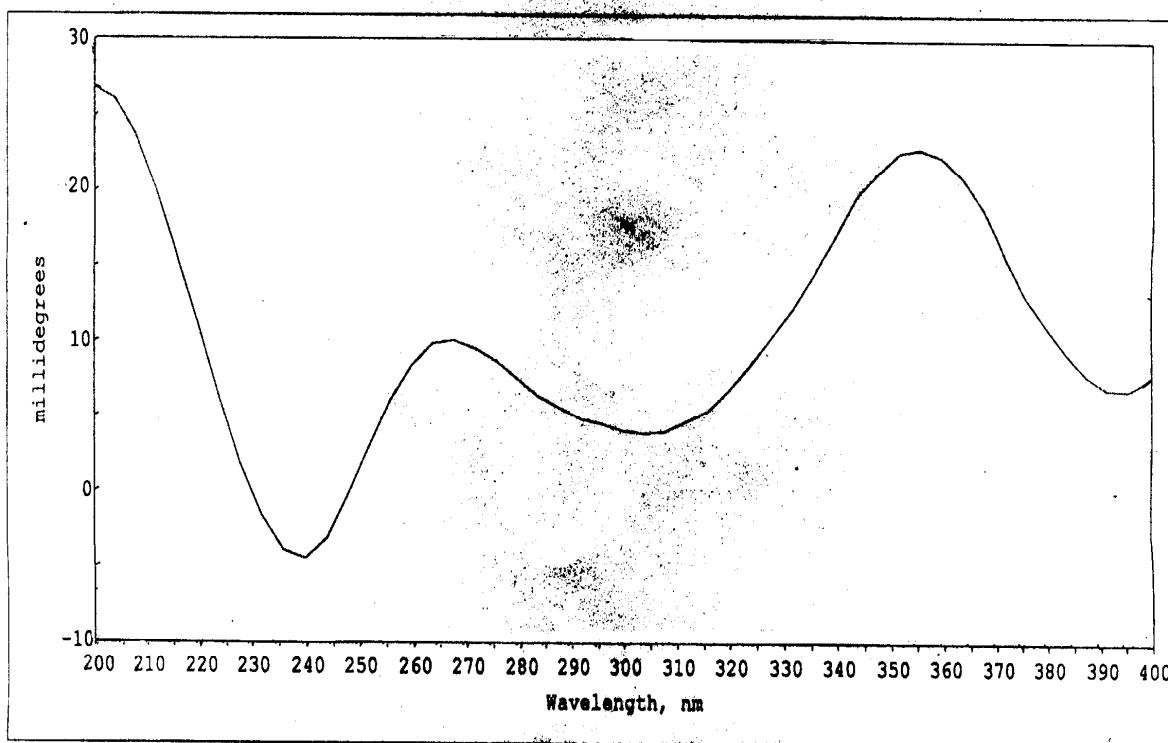

Instrument: RSM  
 Collection mode: Scan  
 Number of points: 50  
 RSM Mono = 400 to 200 nm (2400 lines/mm)  
 Timing mode: as Fxn of HVs  
 Reduction mode: Circular Dichroism  
 Smoothing, Filter: 11  
 Scan mode: Fixed slitwidth  
 Total Elapsed Time = 2:50.5 (min:sec)

Title :  
Run File : c:\star\data\05-9-3-zjy.run  
Method File : c:\star\duzt.mth  
Sample ID : Manual Sample

Injection Date: 04-9-4 3:30      Calculation Date: 04-12-16 16:49

Operator : wls  
Workstation:      Detector Type: Dynamax (2 Volts)  
Instrument : hplc      Bus Address : 24  
Channel : 1 =      Sample Rate : 20.00 Hz  
Run Time : 42.352 min

\*\* Star Chromatography Workstation (Demo) Version 5.3d4 \*\* 05000-1a68-da2-3be9 \*\*

Chart Speed = 0.51 cm/min      Attenuation = 47      Zero Offset = 450%  
Start Time = 0.000 min      End Time = 42.352 min      Min / Tick = 1.00

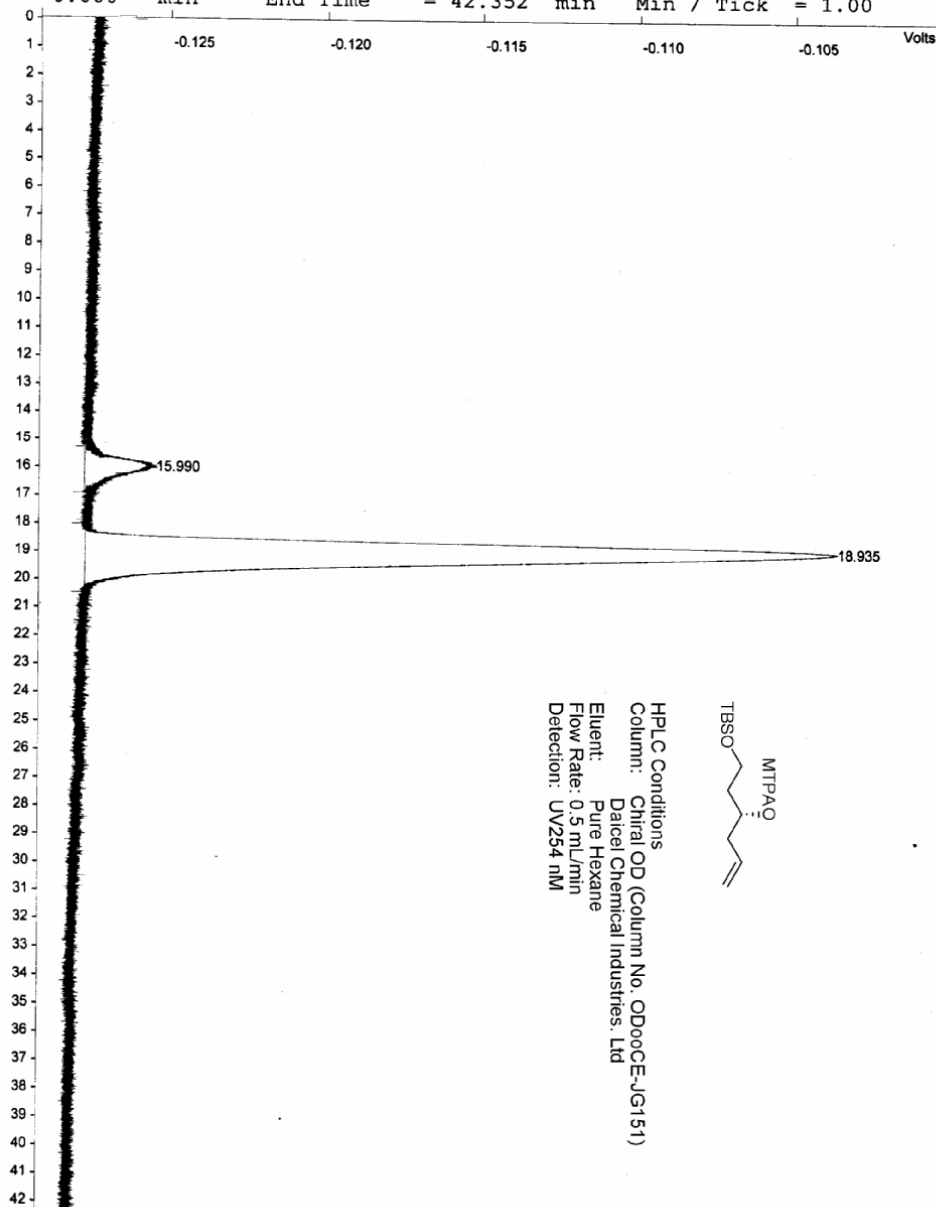

Print Date: Thu Dec 16 16:58:55 2004

Page 1 of 1

Title :  
Run File : c:\star\data\05-9-3-zjy.run  
Method File : c:\star\1\mth  
Sample ID : Manual Sample

Injection Date: 04-9-4 3:30      Calculation Date: 04-12-16 16:49

Operator : wls  
Workstation:                      Detector Type: Dynamax (2 Volts)  
Instrument : hplc                Bus Address : 24  
Channel : 1 =                    Sample Rate : 20.00 Hz  
                                 Run Time : 42.352 min

\*\* Star Chromatography Workstation (Demo) Version 5.3d4 \*\* 05000-1a68-da2-3be9 \*\*

Run Mode : Analysis  
Peak Measurement: Peak Area  
Calculation Type: Percent

| Peak No. | Peak Name | Result O | Ret. Time (min) | Time Offset (min) | Area (counts) | Sep. Code | Width 1/2 (sec) | Status Codes |
|----------|-----------|----------|-----------------|-------------------|---------------|-----------|-----------------|--------------|
| 1        |           | 3.9084   | 15.990          | 0.000             | 46411         | BB        | 31.4            | U            |
| 2        |           | 96.0916  | 18.935          | 0.000             | 1141062       | BB        | 44.8            | U            |
| Totals:  |           | 100.0000 |                 | 0.000             | 1187473       |           |                 |              |

Status Codes:

U - User-defined peak endpoint(s)

Total Unidentified Counts : 1187473 counts

Detected Peaks: 2                      Rejected Peaks: 0                      Identified Peaks: 0

Multiplier: 1                      Divisor: 1                      Unidentified Peak Factor: 0.

Baseline Offset: -126492 microVolts

Noise (used): 641 microVolts - monitored before this run

\*\*\*\*\*
